# Supplementary material for: The CN⋯C–X σ-hole interaction acts as a conformational lock
Source: Royal Society of Chemistry journal article supplement (doi:10.1039/c6nj02622b), 2016-10-26
Supplement: c6nj02622b1.pdf [file c6nj02622b1.pdf]

Electronic Supplementary Material (ESI) for New Journal of Chemistry.  
This journal is © The Royal Society of Chemistry and the Centre National de la Recherche Scientifique 2016

## Supporting Information

for

### **The C=N...C—X $\sigma$ -Hole Interaction Acts as a Conformational Lock**

Zhenfeng Zhang,<sup>‡\*a</sup> Li Wang<sup>‡b</sup> and Xiaopeng Xuan<sup>a</sup>

<sup>a</sup> School of Chemistry and Chemical Engineering, Henan Normal University, Xinxiang 453007, P. R. China

E-mail: zzf@htu.cn

<sup>b</sup> The first affiliated hospital of Xi'an Medical University, Xi'an, 710000, China

## X-Ray structure determination

The selected crystal was mounted in inert oil on glass fibers. Data were measured using Mo-K $\alpha$  radiation on a Bruker SMART 1000 CCD diffractometer. Data collection at 296 K and reduction were performed using SMART and SAINT software.<sup>1</sup>

Absorption correction was applied using the multi-scan method (SADABS).<sup>2</sup> The crystal structures of **1** and **9** were solved by direct methods and refined by full matrix least-squares on  $F^2$  using the SHELXTL program package.<sup>3</sup> All non-hydrogen atoms were subjected to anisotropic refinement and all H atoms were located in difference Fourier maps and their atomic coordinates and isotropic displacement parameters were refined freely. The cyano group in **9** was found to be disordered, the atoms C3 and N3 were therefore modelled over two sets of positions, respectively.

1 SMART 5.0 and SAINT 4.0 for Windows NT, Area Detector Control and Integration Software, Bruker Analytical X-Ray Systems Inc., Madison, WI, 1998.

2 G. M. Sheldrick, SADABS: Program for Empirical Absorption Correction of Area Detector Data, University of Göttingen, Germany, 1996.

3 G. M. Sheldrick, SHELXTL 5.1 for Program for Windows NT: Structure Determination Software Programs, Bruker Analytical X-Ray Systems, Inc., Madison, WI, 1997.
